# Supplementary material for: On the formation of 2- and 3-cyanofurans and their protonated forms in interstellar medium conditions: quantum chemical evidence
Source: Royal Society of Chemistry journal article supplement (doi:10.1039/d2ra04351c), 2022-01-01
Supplement: d2ra04351c1.pdf [file d2ra04351c1.pdf]

# On the formation of 2- and 3-cyanofurans and their protonation in interstellar medium conditions: quantum chemical evidences.

René Simbizi<sup>a,c</sup>, Désiré Nduwimana<sup>a,c</sup>, Joël Niyoncuti<sup>a,c</sup>, Prosper Cishahayo<sup>b,d</sup> and Godefroid Gahungu<sup>b,d</sup>

<sup>a</sup>Faculté des Sciences, Département de Physique, Université du Burundi, BP 2700 Bujumbura, Burundi.

<sup>b</sup>Faculté des Sciences, Département de Chimie, Université du Burundi, BP 2700 Bujumbura, Burundi.

<sup>c</sup>Faculté des Sciences, Centre de Recherche en Mathématique & Physique (CRMP), Université du Burundi, BP 2700 Bujumbura, Burundi.

<sup>d</sup>Faculté des Sciences, Centre de Recherche en Sciences Naturelles et Environnementales (CRSNE), Université du Burundi, BP 2700 Bujumbura, Burundi.

## Supplementary Information (SI)

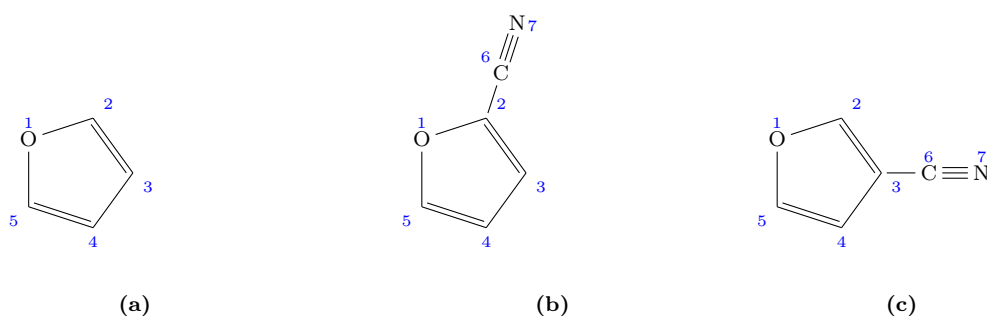

**Scheme S1** – Chemical structures of (a) furan, (b) 2-cyanofuran (2CF), (c) 3-cyanofuran (3CF).

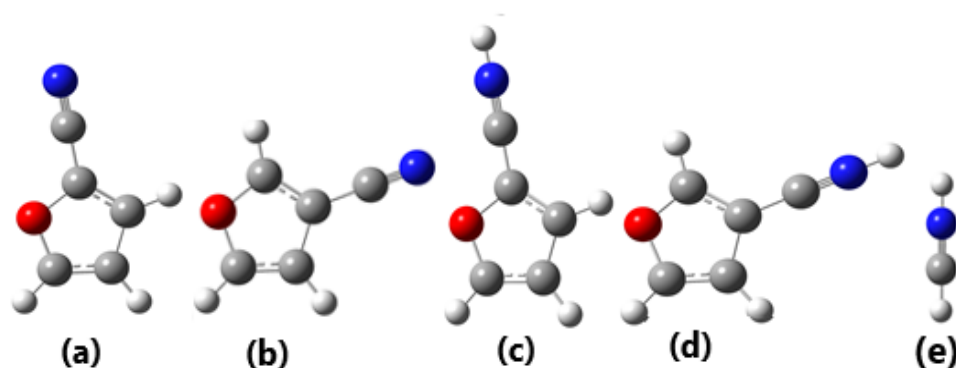

**Figure S1** – B3LYP/6-31G(d,p) optimized 3D geometries for: (a) 2CF, (b) 3CF, (c) 2CFH<sup>+</sup>, (d) 3CFH<sup>+</sup> and (e) HCNH<sup>+</sup> (red=O, gray=C, blue=N and light gray=H).

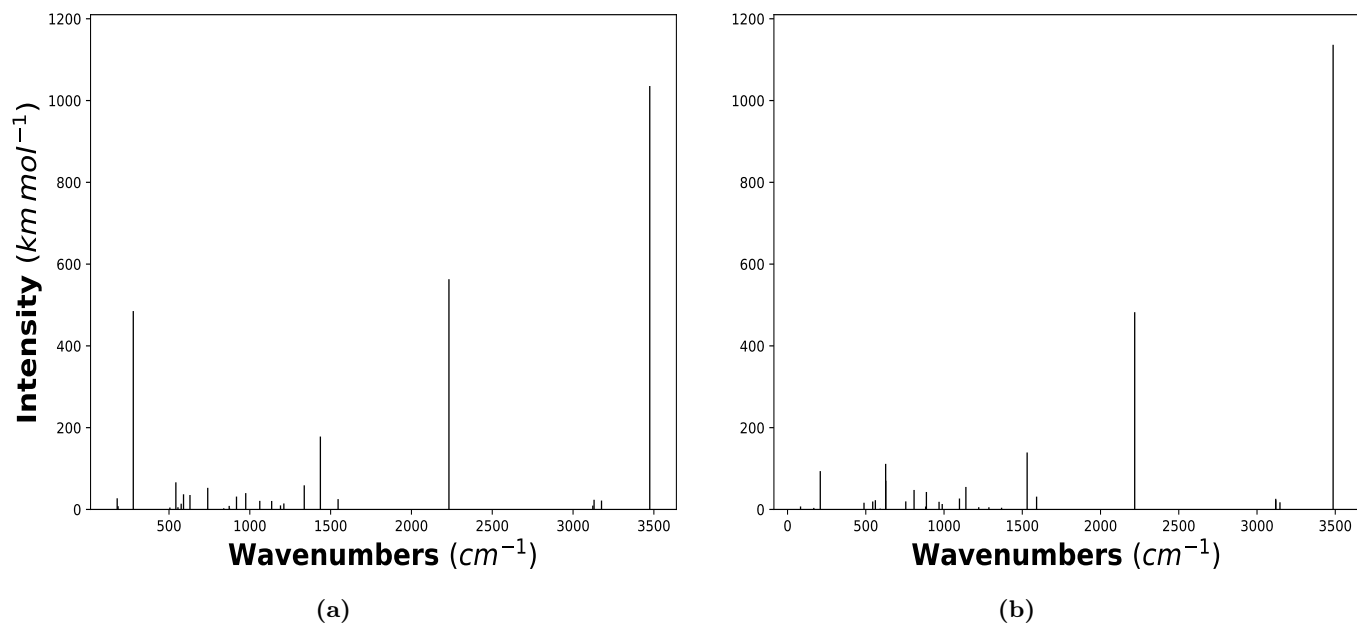

Figure S2 – Simulated IR spectra for (a) 2  $CFH^+$  and (b) 3  $CFH^+$ .

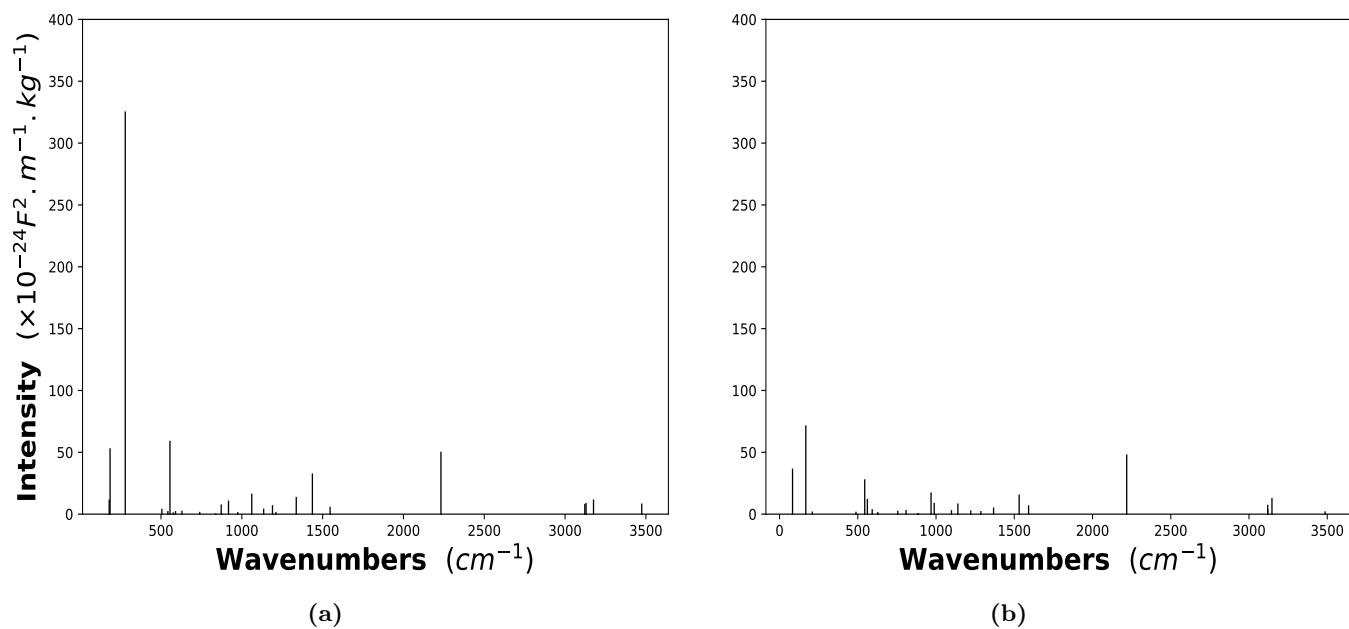

Figure S3 – Simulated Raman spectra for (a) 2  $CFH^+$  and (b) 3  $CFH^+$ .

**Table S1** – Experimental and calculated bond lengths (in Å), bond angles (in °) and rotational constants (in MHz) at different levels of theory.

| Paramètres<br>Géométriques  | HF                 | MP2                | MP3                | M062X              | M062X              | M062X              | B3LYP              | Basis <sup>5</sup> | Basis <sup>6</sup> | Basis <sup>7</sup> | Exp.   |
|-----------------------------|--------------------|--------------------|--------------------|--------------------|--------------------|--------------------|--------------------|--------------------|--------------------|--------------------|--------------------|--------------------|--------------------|--------------------|--------------------|--------------------|--------|
|                             | Basis <sup>1</sup> | Basis <sup>2</sup> | Basis <sup>3</sup> | Basis <sup>4</sup> | Basis <sup>2</sup> | Basis <sup>4</sup> | Basis <sup>1</sup> | Basis <sup>2</sup> | Basis <sup>4</sup> | Basis <sup>2</sup> | Basis <sup>4</sup> | Basis <sup>2</sup> | Basis <sup>4</sup> | Basis <sup>5</sup> | Basis <sup>6</sup> | Basis <sup>7</sup> | Exp.   |
| <b>Bond lengths (in Å)</b>  |                    |                    |                    |                    |                    |                    |                    |                    |                    |                    |                    |                    |                    |                    |                    |                    |        |
| O1-C5/O1-C2                 | 1.3438             | 1.3653             | 1.3566             | 1.3542             | 1.3542             | 1.3530             | 1.3643             | 1.3641             | 1.3621             | 1.3641             | 1.3621             | 1.3628             | 1.3628             | 1.3628             | 1.3656             | 1.3513             | 1.362  |
| C2=C3/C4=C5                 | 1.3391             | 1.3664             | 1.3607             | 1.3563             | 1.3563             | 1.3511             | 1.3607             | 1.3606             | 1.3546             | 1.3606             | 1.3546             | 1.3553             | 1.3553             | 1.3553             | 1.3627             | 1.3506             | 1.361  |
| C3-C4                       | 1.4410             | 1.4273             | 1.4419             | 1.4341             | 1.4341             | 1.4331             | 1.4357             | 1.4355             | 1.4327             | 1.4355             | 1.4327             | 1.4332             | 1.4332             | 1.4371             | 1.4324             | 1.431              | 1.431  |
| C2-H6/C5-H9                 | 1.0681             | 1.0752             | 1.0786             | 1.0782             | 1.0782             | 1.0744             | 1.0793             | 1.0787             | 1.0744             | 1.0787             | 1.0744             | 1.0742             | 1.0742             | 1.0794             | 1.075              | 1.075              | 1.075  |
| C3-H7/C4-H8                 | 1.0702             | 1.0764             | 1.0798             | 1.0791             | 1.0791             | 1.0751             | 1.0811             | 1.0803             | 1.0758             | 1.0803             | 1.0758             | 1.0757             | 1.0757             | 1.0816             | 1.077              | 1.077              | 1.077  |
| <b>Bond angles (in °)</b>   |                    |                    |                    |                    |                    |                    |                    |                    |                    |                    |                    |                    |                    |                    |                    |                    |        |
| C5-O1-C2                    | 107.1              | 106.6              | 106.8              | 107.7              | 107.7              | 106.9              | 106.8              | 106.9              | 106.7              | 106.9              | 106.7              | 106.5              | 106.5              | 107.0              | 107.0              | 107.0              | -      |
| O1-C2=C3/O1-C5=C4           | 110.8              | 110.5              | 110.9              | 110.6              | 110.6              | 110.7              | 110.5              | 110.5              | 110.5              | 110.5              | 110.5              | 110.4              | 110.4              | 110.4              | 110.4              | 110.6              | 110.7  |
| C5=C4-C3/C2=C3-C4           | 105.6              | 106.2              | 105.7              | 105.9              | 105.9              | 105.9              | 106.1              | 106.1              | 106.1              | 106.1              | 106.1              | 106.2              | 106.2              | 106.1              | 105.9              | 106.0              | 106.0  |
| O1-C2-H6/O1-C5-H9           | 116.4              | 115.7              | 115.9              | 115.9              | 115.9              | 116.1              | 115.6              | 115.8              | 116.0              | 115.8              | 116.0              | 116.0              | 116.0              | 115.7              | 116.1              | 115.9              | 115.9  |
| C3-C2-H6/C4-C5-H9           | 133.05             | 133.8              | 133.2              | 133.6              | 133.6              | 133.3              | 133.8              | 133.7              | 133.5              | 133.7              | 133.5              | 133.5              | 133.5              | 133.9              | 133.3              | 133.3              | -      |
| C3-C4-H8/C4-C3-H7           | 127.6              | 127.6              | 127.7              | 127.5              | 127.5              | 127.7              | 127.3              | 127.2              | 127.4              | 127.2              | 127.4              | 127.5              | 127.5              | 127.4              | 127.6              | 127.6              | 127.9  |
| <b>Rotational constants</b> |                    |                    |                    |                    |                    |                    |                    |                    |                    |                    |                    |                    |                    |                    |                    |                    |        |
| A (MHZ)                     | 9605.1             | 9492.0             | 9499.1             | 9529.5             | 9529.5             | 9559.9             | 9459.7             | 9460.5             | 9500.6             | 9460.5             | 9500.6             | 9484.5             | 9484.5             | 9428.7             | 9569.4             | 9446.9             | 9446.9 |
| B (MHZ)                     | 9535.3             | 9201.9             | 9258.7             | 9335.2             | 9335.2             | 9385.4             | 9247.9             | 9252.7             | 9317.9             | 9252.7             | 9317.9             | 9318.0             | 9318.0             | 9237.5             | 9400.5             | 9246.6             | 9246.6 |
| C (MHZ)                     | 4785.1             | 4672.4             | 4688.7             | 4715.7             | 4715.7             | 4735.9             | 4676.3             | 4677.7             | 4704.1             | 4677.7             | 4704.1             | 4700.3             | 4700.3             | 4666.1             | 4742.1             | 4670.8             | 4670.8 |
| Δ A (MHZ)                   | 158.2              | 45.1               | 52.2               | 82.6               | 82.6               | 113                | 12.8               | 13.6               | 53.7               | 13.6               | 53.7               | 37.6               | 37.6               | -18.2              | 122.5              | 0.0                | 0.0    |
| Δ B (MHZ)                   | 358.5              | -44.7              | 12.1               | 88.6               | 88.6               | 138.8              | 1.3                | 6.1                | 71.3               | 6.1                | 71.3               | 71.4               | 71.4               | -9.1               | 153.9              | 0.0                | 0.0    |
| Δ C (MHZ)                   | 114.3              | 1.6                | 17.9               | 44.9               | 44.9               | 65.1               | 5.5                | 6.9                | 33.3               | 6.9                | 33.3               | 29.5               | 29.5               | -4.7               | 71.3               | 0.0                | 0.0    |

<sup>1</sup>Basis set: 6-31G(d); <sup>2</sup>Basis set: 6-31G(d,p); <sup>3</sup>Basis set: 6-311G(d); <sup>4</sup>Basis set: 6-311G(2d,2p); <sup>5</sup>Basis set: 6-311+G(2d,2p); <sup>6</sup>Basis set: 6-31+G(d); <sup>7</sup>Basis set: 6-311g(2df,2p).

**Table S2** – Experimental and B3LYP/6-31G(d,p) optimized geometrical parameters (including empirical corrections) for Furan, 2 CF, 3CF, 2 CFH<sup>+</sup> and 3CFH<sup>+</sup> (bond lengths in Å, bond angles in ° and rotational constants in MHz <sup>(1)</sup>).

|                    | Furan   |                  | 2 CF   |                  | 3CF     | 2CFH <sup>+</sup> | 3CFH <sup>+</sup> | HCNH <sup>+</sup> |                  |
|--------------------|---------|------------------|--------|------------------|---------|-------------------|-------------------|-------------------|------------------|
|                    | Calc    | Exp <sup>a</sup> | Calc   | Exp <sup>b</sup> | Calc    | Calc              | Calc              | Calc              | Exp <sup>c</sup> |
| <b>Bond length</b> |         |                  |        |                  |         |                   |                   |                   |                  |
| O-C2               | 1.3584  | 1.362            | 1.3589 | -                | 1.3422  | 1.3722            | 1.3212            |                   |                  |
| O-C5               | 1.3584  | 1.362            | 1.350  | -                | 1.3605  | 1.3503            | 1.3796            |                   |                  |
| C2=C3              | 1.3622  | 1.361            | 1.3679 | -                | 1.3746  | 1.3726            | 1.3909            |                   |                  |
| C3-C4              | 1.4520  | 1.431            | 1.4462 | -                | 1.44106 | 1.4423            | 1.4514            |                   |                  |
| C4=C5              | 1.3622  | 1.361            | 1.3730 | -                | 1.3478  | 1.3663            | 1.3519            |                   |                  |
| C2/C3-C6           | -       | -                | 1.099  | -                | 1.4163  | 1.4099            | 1.3856            |                   |                  |
| C≡N                | -       | -                | 1.1717 | -                | 1.1655  | 1.1716            | 1.1571            | 1.1397            | 1.1368           |
| N-H                | -       | -                | -      | -                | -       | 1.0113            | 1.0069            | 1.0171            | 1.0091           |
| <b>Bond angle</b>  |         |                  |        |                  |         |                   |                   |                   |                  |
| C5-O-C2            | 107.13  | 106.5            | 105.42 | -                | 107.35  | 105.60            | 108.77            |                   |                  |
| O-C2=C3            | 110.814 | 110.7            | 111.29 | -                | 110.41  | 111.64            | 108.63            |                   |                  |
| O-C5=C4            | 110.814 | 110.7            | 113.28 | -                | 110.85  | 111.99            | 111.09            |                   |                  |
| C5=C4-C3           | 105.622 | 106.0            | 103.52 | -                | 105.96  | 105.89            | 104.04            |                   |                  |
| C2=C3-C4           | 105.622 | 106.0            | 105.66 | -                | 105.43  | 104.87            | 107.48            |                   |                  |
| C2/C3-C6≡N         | -       | -                | -      | -                | 179.54  | 175.05            | 179.34            |                   |                  |
| C6≡N-H             | -       | -                | -      | -                | -       | 155.00            | 179.87            |                   |                  |

<sup>(1)</sup>Numbering scheme used is that of Scheme S1.; <sup>a</sup>Experimental data from Bak et al. (1962). <sup>b</sup>Experimental data from Engelbrecht & Sutter (1976). <sup>c</sup>Experimental data from Amano and Keiichi (1986).

**Table S3** – G2MP2 and G3 Proton Affinity (PA in kJ/mol) of 2-cyanofuran (2 CF) and 3-cyanofuran (3 CF) at different sites for T = 298 K and 10 K.

| Site <sup>(1)</sup> | T = 298 K |        |        |        | T = 10 K |        |        |        |
|---------------------|-----------|--------|--------|--------|----------|--------|--------|--------|
|                     | 2 CF      |        | 3 CF   |        | 2 CF     |        | 3 CF   |        |
|                     | G2MP2     | G3     | G2MP2  | G3     | G2MP2    | G3     | G2MP2  | G3     |
| 1                   | 643.39    | 642.18 | 636.48 | 635.54 | 635.93   | 634.71 | 631.33 | 630.39 |
| 2                   | 732.07    | 727.39 | 753.58 | 751.89 | 726.97   | 722.29 | 748.65 | 746.96 |
| 3                   | 702.78    | 701.18 | 677.78 | 672.71 | 698.23   | 696.65 | 672.97 | 667.90 |
| 4                   | 709.78    | 707.45 | 709.00 | 706.34 | 705.07   | 702.76 | 704.26 | 701.60 |
| 5                   | 747.83    | 746.38 | 747.75 | 745.32 | 742.97   | 735.37 | 742.78 | 740.35 |
| N                   | 795.14    | 796.35 | 801.47 | 802.75 | 790.48   | 791.69 | 796.57 | 797.85 |

<sup>(1)</sup>Numbering scheme used is that of Scheme S1; <sup>a</sup>Experimental data from Bak et al. (1962) <sup>b</sup>Experimental data from Engelbrecht & Sutter (1967)

**Table S4** – G2MP2 and G3 Proton Affinity (PA in kJ/mol) of 2-cyanofuran (2 CF) and 3-cyanofuran (3 CF) at different sites for T = 298 K and 10 K.

| Site | T = 150 K |        |        |        | T = 5 K |        |        |        |
|------|-----------|--------|--------|--------|---------|--------|--------|--------|
|      | 2 CF      |        | 3 CF   |        | 2 CF    |        | 3 CF   |        |
|      | G2MP2     | G3     | G2MP2  | G3     | G2MP2   | G3     | G2MP2  | G3     |
| 1    | 647.21    | 645.99 | 634.11 | 633.18 | 638.19  | 636.98 | 631.23 | 630.29 |
| 2    | 735.89    | 731.20 | 751.27 | 749.58 | 726.87  | 722.19 | 748.55 | 746.86 |
| 3    | 707.15    | 699.20 | 675.47 | 670.41 | 698.13  | 696.55 | 672.87 | 667.80 |
| 4    | 707.68    | 705.36 | 706.88 | 704.22 | 704.97  | 702.65 | 686.37 | 701.50 |
| 5    | 745.57    | 744.11 | 745.42 | 743.00 | 742.87  | 741.43 | 725.12 | 740.24 |
| N    | 793.15    | 794.35 | 799.32 | 800.60 | 790.38  | 791.59 | 778.84 | 797.75 |

**Table S5** – Gase phase G2MP2 and G3 calculated enthalpy, entropy and Gibbs free energy variations ( $\Delta_r H$ ,  $\Delta_r S$  and  $\Delta_r G$  in  $\text{kJ mol}^{-1}$ ) of reaction producing cyanofurans and their protonated forms ( $T = 150 \text{ K}$  and  $T = 5 \text{ K}$  for  $P = 10^{-5} \text{ atm}$ ).

| Equation of the reaction                                                                     |     | T = 150 K    |              |              | T = 5 K      |              |              | level of theory |
|----------------------------------------------------------------------------------------------|-----|--------------|--------------|--------------|--------------|--------------|--------------|-----------------|
|                                                                                              |     | $\Delta_r H$ | $\Delta_r G$ | $\Delta_r S$ | $\Delta_r H$ | $\Delta_r G$ | $\Delta_r S$ |                 |
| $\text{C}_4\text{H}_3\text{O}^+ + \text{CN}^- \longrightarrow 2 \text{CF} + \text{H}$        | (1) | -566.33      | -557.82      | -0.056       | -533.38      | -533.20      | -0.036       | G2MP2           |
|                                                                                              |     | -569.11      | -560.59      | -0.056       | -568.94      | -568.75      | -0.038       | G3              |
| $\text{C}_4\text{H}_3\text{O}^+ + \text{CN}^- \longrightarrow 3 \text{CF} + \text{H}$        | (2) | -573.21      | -564.72      | -0.056       | -540.24      | -540.06      | -0.036       | G2MP2           |
|                                                                                              |     | -575.26      | -566.76      | -0.056       | -575.08      | -574.88      | -0.038       | G3              |
| $\text{C}_4\text{H}_3\text{OCN} + \text{H}_3^+ \longrightarrow 2 \text{CF-H}^+ + \text{H}_2$ | (3) | -379.19      | -345.81      | -0.222       | -375.23      | -374.58      | -0.128       | G2MP2           |
|                                                                                              |     | -376.34      | -373.42      | -0.019       | -375.98      | -375.95      | -0.007       | G3              |
| $\text{C}_4\text{H}_3\text{OCN} + \text{H}_3^+ \longrightarrow 3 \text{CF-H}^+ + \text{H}_2$ | (4) | -385.36      | -351.86      | -0.223       | -381.32      | -380.68      | -0.128       | G2MP2           |
|                                                                                              |     | -382.60      | -379.54      | -0.020       | -382.15      | -382.12      | -0.007       | G3              |

**Table S6** – Potential energy distribution of fundamental vibrational modes of  $2 \text{CFH}^+$ 

| Frequency<br>( $\text{cm}^{-1}$ ) | PED<br>(%) | Mode                           | Atoms <sup>1</sup> |    |    |   | PED<br>(%) | Mode                      | Atoms <sup>1</sup> |    |    |   |
|-----------------------------------|------------|--------------------------------|--------------------|----|----|---|------------|---------------------------|--------------------|----|----|---|
|                                   |            |                                | h                  | k  | l  | m |            |                           | h                  | k  | l  | m |
| <b>In - plane modes</b>           |            |                                |                    |    |    |   |            |                           |                    |    |    |   |
| 3475                              | 97%        | $\nu_{\text{NH}}$              | 7                  | 11 | 0  | 0 |            |                           |                    |    |    |   |
| 3176                              | 97%        | $\nu_{\text{CH}}$              | 5                  | 10 | 0  | 0 |            |                           |                    |    |    |   |
| 3130                              | 61%        | $\nu_{\text{CH}}$              | 3                  | 8  | 0  | 0 | 37%        | $\nu_{\text{CH}}$         | 4                  | 9  | 0  | 0 |
| 3122                              | 60%        | $\nu_{\text{CH}}$              | 4                  | 9  | 0  | 0 | 38%        | $\nu_{\text{CH}}$         | 5                  | 10 | 0  | 0 |
| 2232                              | 85%        | $\nu_{\text{C}\equiv\text{N}}$ | 6                  | 7  | 0  | 0 | 12%        | $\nu_{\text{CC}}$         | 3                  | 6  | 0  | 0 |
| 1546                              | 36%        | $\nu_{\text{C}=\text{C}}$      | 2                  | 3  | 0  | 0 | 23%        | $\nu_{\text{C}=\text{C}}$ | 4                  | 5  | 0  | 0 |
|                                   | 7%         | $\nu_{\text{CC}}$              | 3                  | 6  | 0  | 0 | 7%         | $\delta_{\text{CH}}$      | 4                  | 3  | 8  | 0 |
|                                   | 6%         | $\delta_{\text{CH}}$           | 3                  | 4  | 9  | 0 |            |                           |                    |    |    |   |
| 1437                              | 29%        | $\nu_{\text{C}=\text{C}}$      | 4                  | 5  | 0  | 0 | 25%        | $\nu_{\text{C}=\text{C}}$ | 2                  | 3  | 0  | 0 |
|                                   | 13%        | $\delta_{\text{CH}}$           | 1                  | 5  | 10 | 0 | 7%         | $\delta_{\text{OC}}$      | 2                  | 1  | 5  | 0 |
|                                   | 7%         | $\delta_{\text{CH}}$           | 4                  | 5  | 10 | 0 | 6%         | $\nu_{\text{CC}}$         | 3                  | 6  | 0  | 0 |
| 1337                              | 19%        | $\nu_{\text{CC}}$              | 3                  | 4  | 0  | 0 | 17%        | $\delta_{\text{CH}}$      | 3                  | 4  | 9  | 0 |
|                                   | 11%        | $\delta_{\text{CH}}$           | 4                  | 5  | 10 | 0 | 9%         | $\delta_{\text{CH}}$      | 4                  | 5  | 10 | 0 |
|                                   | 9%         | $\nu_{\text{OC}}$              | 1                  | 5  | 0  | 0 | 5%         | $\delta_{\text{CH}}$      | 2                  | 3  | 8  | 0 |
| 1211                              | 38%        | $\nu_{\text{OC}}$              | 1                  | 2  | 0  | 0 | 23%        | $\nu_{\text{CC}}$         | 3                  | 6  | 0  | 0 |
|                                   | 5%         | $\delta_{\text{CC}}$           | 1                  | 2  | 3  | 0 |            |                           |                    |    |    |   |
| 1190                              | 26%        | $\delta_{\text{CH}}$           | 2                  | 3  | 8  | 0 | 23%        | $\delta_{\text{CH}}$      | 4                  | 3  | 8  | 0 |
|                                   | 14%        | $\nu_{\text{CC}}$              | 3                  | 4  | 0  | 0 | 13%        | $\delta_{\text{CH}}$      | 1                  | 5  | 10 | 0 |
|                                   | 8%         | $\delta_{\text{CH}}$           | 4                  | 5  | 10 | 0 | 5%         | $\nu_{\text{CH}}$         | 3                  | 6  | 0  | 0 |
| 1135                              | 39%        | $\nu_{\text{OC}}$              | 1                  | 5  | 0  | 0 | 20%        | $\delta_{\text{CH}}$      | 1                  | 5  | 10 | 0 |
|                                   | 12%        | $\nu_{\text{C}=\text{C}}$      | 4                  | 5  | 0  | 0 | 11%        | $\delta_{\text{CH}}$      | 4                  | 5  | 10 | 0 |
| 1062                              | 28%        | $\nu_{\text{OC}}$              | 1                  | 5  | 0  | 0 | 19%        | $\delta_{\text{CH}}$      | 3                  | 4  | 9  | 0 |
|                                   | 17%        | $\delta_{\text{CH}}$           | 5                  | 4  | 9  | 0 | 8%         | $\nu_{\text{C}=\text{C}}$ | 4                  | 5  | 0  | 0 |
|                                   | 6%         | $\nu_{\text{CC}}$              | 3                  | 4  | 0  | 0 | 5%         | $\delta_{\text{CH}}$      | 4                  | 5  | 10 | 0 |
| 975                               | 33%        | $\nu_{\text{CC}}$              | 3                  | 4  | 0  | 0 | 21%        | $\delta_{\text{CH}}$      | 4                  | 3  | 8  | 0 |
|                                   | 12%        | $\delta_{\text{CH}}$           | 3                  | 4  | 9  | 0 | 11%        | $\delta_{\text{CC}}$      | 2                  | 3  | 8  | 0 |
|                                   | 10%        | $\delta_{\text{C}=\text{C}}$   | 5                  | 4  | 9  | 0 |            |                           |                    |    |    |   |
| 918                               | 29%        | $\nu_{\text{OC}}$              | 1                  | 2  | 0  | 0 | 16%        | $\delta_{\text{OC}}$      | 2                  | 1  | 5  | 0 |
|                                   | 11%        | $\delta_{\text{CH}}$           | 4                  | 5  | 10 | 0 | 8%         | $\nu_{\text{C}=\text{C}}$ | 2                  | 3  | 0  | 0 |
|                                   | 6%         | $\delta_{\text{CH}}$           | 5                  | 4  | 9  | 0 |            |                           |                    |    |    |   |
| 872                               | 25%        | $\delta_{\text{CC}}$           | 3                  | 4  | 5  | 0 | 24%        | $\delta_{\text{OC}}$      | 4                  | 5  | 1  | 0 |
|                                   | 121%       | $\delta_{\text{CC}}$           | 2                  | 3  | 4  | 0 | 9%         | $\delta_{\text{OC}}$      | 2                  | 1  | 5  | 0 |
|                                   | 9%         | $\delta_{\text{CH}}$           | 2                  | 3  | 8  | 0 | 7%         | $\delta_{\text{CH}}$      | 3                  | 4  | 9  | 0 |
| 590                               | 39%        | $\delta_{\text{CN}}$           | 2                  | 6  | 7  | 0 | 15%        | $\delta_{\text{CNH}}$     | 6                  | 7  | 11 | 0 |

(Continued)

Table S6 – (Continued)

| Frequency<br>( $\text{cm}^{-1}$ ) | PED<br>(%) | Mode                           | Atoms <sup>1</sup> |   |   |    | PED<br>(%) | Mode                           | Atoms <sup>1</sup> |   |    |    |
|-----------------------------------|------------|--------------------------------|--------------------|---|---|----|------------|--------------------------------|--------------------|---|----|----|
|                                   |            |                                | h                  | k | l | m  |            |                                | h                  | k | l  | m  |
| 575                               | 12%        | $\delta_{\text{CN}}$           | 2                  | 6 | 7 | 0  | 9%         | $\nu_{\text{CC}}$              | 1                  | 2 | 6  | 0  |
|                                   | 24%        | $\nu_{\text{CN}}$              | 2                  | 6 | 7 | 0  | 20%        | $\delta_{\text{CNH}}$          | 6                  | 7 | 11 | 0  |
|                                   | 10%        | $\delta_{\text{CC}}$           | 1                  | 2 | 6 | 0  | 9%         | $\delta_{\text{CC}}$           | 3                  | 2 | 6  | 0  |
| 555                               | 47%        | $\nu_{\text{CC}}$              | 2                  | 6 | 0 | 0  | 11%        | $\delta_{\text{CC}}$           | 1                  | 2 | 3  | 0  |
|                                   | 8%         | $\nu_{\text{C}\equiv\text{N}}$ | 6                  | 7 | 0 | 0  | 6%         | $\delta_{\text{OC}}$           | 2                  | 1 | 5  | 0  |
| 279                               | 5%         | $\delta_{\text{CC}}$           | 2                  | 3 | 4 | 0  |            |                                |                    |   |    |    |
|                                   | 62%        | $\delta_{\text{CNH}}$          | 2                  | 6 | 7 | 0  | 15%        | $\nu_{\text{C}\equiv\text{N}}$ | 6                  | 7 | 0  | 0  |
| 185                               | 11%        | $\delta_{\text{CN}}$           | 2                  | 6 | 7 | 0  |            |                                |                    |   |    |    |
|                                   | 48%        | $\delta_{\text{CN}}$           | 2                  | 6 | 7 | 0  | 23%        | $\delta_{\text{CC}}$           | 1                  | 2 | 6  | 0  |
|                                   | 22%        | $\delta_{\text{CC}}$           | 3                  | 2 | 6 | 0  |            |                                |                    |   |    |    |
| <b>Out-of-plane modes</b>         |            |                                |                    |   |   |    |            |                                |                    |   |    |    |
| 875                               | 31%        | $\gamma_{\text{HCCH}}$         | 8                  | 3 | 4 | 9  | 24%        | $\gamma_{\text{HCCH}}$         | 9                  | 4 | 5  | 10 |
|                                   | 9%         | $\gamma_{\text{OCCH}}$         | 1                  | 5 | 4 | 9  | 8%         | $\gamma_{\text{CCCH}}$         | 6                  | 2 | 3  | 8  |
|                                   | 7%         | $\gamma_{\text{CCCH}}$         | 2                  | 3 | 4 | 9  | 7%         | $\gamma_{\text{OCCH}}$         | 1                  | 2 | 3  | 8  |
| 839                               | 28%        | $\gamma_{\text{HCCH}}$         | 9                  | 4 | 5 | 10 | 23%        | $\gamma_{\text{CCCH}}$         | 3                  | 4 | 5  | 10 |
|                                   | 10%        | $\gamma_{\text{CCCH}}$         | 6                  | 2 | 3 | 8  | 10%        | $\gamma_{\text{COCH}}$         | 2                  | 1 | 5  | 10 |
|                                   | 9%         | $\gamma_{\text{CCCH}}$         | 5                  | 4 | 3 | 8  | 8%         | $\gamma_{\text{OCCH}}$         | 1                  | 2 | 3  | 8  |
| 740                               | 30%        | $\gamma_{\text{OCCH}}$         | 1                  | 5 | 4 | 9  | 22%        | $\gamma_{\text{CCCH}}$         | 2                  | 3 | 4  | 9  |
|                                   | 11%        | $\gamma_{\text{OCCH}}$         | 1                  | 2 | 3 | 8  | 10%        | $\gamma_{\text{CCCH}}$         | 6                  | 2 | 3  | 8  |
| 630                               | 9%         | $\gamma_{\text{CCCH}}$         | 3                  | 4 | 5 | 10 | 6%         | $\gamma_{\text{CCCH}}$         | 5                  | 4 | 3  | 8  |
|                                   | 23%        | $\gamma_{\text{CCNH}}$         | 2                  | 6 | 7 | 11 | 22%        | $\gamma_{\text{CCN}}$          | 0                  | 2 | 6  | 7  |
|                                   | 11%        | $\gamma_{\text{CCN}}$          | 3                  | 6 | 7 | 9  | 7%         | $\gamma_{\text{COCC}}$         | 5                  | 1 | 2  | 3  |
| 542                               | 7%         | $\gamma_{\text{OCCC}}$         | 1                  | 2 | 3 | 4  | 6%         | $\gamma_{\text{CCCH}}$         | 6                  | 2 | 3  | 8  |
|                                   | 78%        | $\gamma_{\text{CCNH}}$         | 2                  | 6 | 7 | 11 |            |                                |                    |   |    |    |
| 505                               | 85%        | $\gamma_{\text{CCN}}$          | 0                  | 2 | 6 | 7  |            |                                |                    |   |    |    |
| 179                               | 38%        | $\gamma_{\text{CCCC}}$         | 4                  | 3 | 2 | 6  | 23%        | $\gamma_{\text{CCCH}}$         | 6                  | 2 | 3  | 8  |
|                                   | 21%        | $\gamma_{\text{COCC}}$         | 5                  | 1 | 2 | 6  | 11%        | $\gamma_{\text{CCN}}$          | 0                  | 2 | 6  | 7  |

<sup>a</sup>Only contributions greater than 5% were taken into account; <sup>b</sup>See Scheme S1 for atom numbering;

<sup>c</sup> $\nu$ : stretching;  $\delta$ : in-plane bending modes;  $\gamma$ : out-of-plane bending modes.

Table S7 – Potential energy distribution of fundamental vibrational modes of  $3\text{CFH}^+$ 

| Frequency<br>( $\text{cm}^{-1}$ ) | PED<br>(%) | Mode                           | Atoms <sup>1</sup> |    |   |   | PED<br>(%) | Mode                      | Atoms <sup>1</sup> |    |    |   |
|-----------------------------------|------------|--------------------------------|--------------------|----|---|---|------------|---------------------------|--------------------|----|----|---|
|                                   |            |                                | h                  | k  | l | m |            |                           | h                  | k  | l  | m |
| <b>In - plane modes</b>           |            |                                |                    |    |   |   |            |                           |                    |    |    |   |
| 3486                              | 97%        | $\nu_{\text{NH}}$              | 7                  | 11 | 0 | 0 |            |                           |                    |    |    |   |
| 3147                              | 82%        | $\nu_{\text{CH}}$              | 5                  | 10 | 0 | 0 | 16%        | $\nu_{\text{CH}}$         | 4                  | 9  | 0  | 0 |
| 3120                              | 90%        | $\nu_{\text{CH}}$              | 2                  | 8  | 0 | 0 | 9%         | $\nu_{\text{CH}}$         | 4                  | 9  | 0  | 0 |
| 3120                              | 90%        | $\nu_{\text{CH}}$              | 4                  | 9  | 0 | 0 | 17%        | $\nu_{\text{CH}}$         | 5                  | 10 | 0  | 0 |
| 2218                              | 8%         | $\nu_{\text{CH}}$              | 2                  | 8  | 0 | 0 |            |                           |                    |    |    |   |
|                                   | 79%        | $\nu_{\text{C}\equiv\text{N}}$ | 6                  | 7  | 0 | 0 | 18%        | $\nu_{\text{CC}}$         | 2                  | 6  | 0  | 0 |
| 1591                              | 54%        | $\nu_{\text{C}=\text{C}}$      | 4                  | 5  | 0 | 0 | 10%        | $\nu_{\text{C}=\text{C}}$ | 2                  | 3  | 0  | 0 |
|                                   | 8%         | $\delta_{\text{CH}}$           | 3                  | 4  | 9 | 0 |            |                           |                    |    |    |   |
| 1531                              | 35%        | $\nu_{\text{C}=\text{C}}$      | 2                  | 3  | 0 | 0 | 15%        | $\nu_{\text{C}=\text{C}}$ | 3                  | 6  | 0  | 0 |
|                                   | 13%        | $\nu_{\text{C}=\text{C}}$      | 4                  | 5  | 0 | 0 | 8%         | $\delta_{\text{CH}}$      | 1                  | 2  | 8  | 0 |
| 1368                              | 7%         | $\delta_{\text{CH}}$           | 3                  | 2  | 8 | 0 |            |                           |                    |    |    |   |
|                                   | 40%        | $\nu_{\text{CC}}$              | 3                  | 4  | 0 | 0 | 15%        | $\nu_{\text{C}=\text{C}}$ | 2                  | 3  | 0  | 0 |
|                                   | 6%         | $\delta_{\text{CH}}$           | 5                  | 4  | 9 | 0 | 6%         | $\delta_{\text{CH}}$      | 4                  | 5  | 10 | 0 |

(Continued)

Table S7 – (Continued)

| Frequency<br>( $\text{cm}^{-1}$ ) | PED<br>(%) | Mode                           | Atoms <sup>1</sup> |   |    |    | PED<br>(%) | Mode                           | Atoms <sup>1</sup> |   |    |    |
|-----------------------------------|------------|--------------------------------|--------------------|---|----|----|------------|--------------------------------|--------------------|---|----|----|
|                                   |            |                                | h                  | k | l  | m  |            |                                | h                  | k | l  | m  |
| 1287                              | 23%        | $\nu_{\text{CC}}$              | 3                  | 6 | 0  | 0  | 19%        | $\nu_{\text{OC}}$              | 1                  | 2 | 0  | 0  |
|                                   | 18%        | $\delta_{\text{CH}}$           | 1                  | 2 | 8  | 0  | 13%        | $\delta_{\text{CH}}$           | 3                  | 2 | 8  | 0  |
|                                   | 6%         | $\nu_{\text{C}\equiv\text{N}}$ | 6                  | 7 | 0  | 0  |            |                                |                    |   |    |    |
| 1222                              | 19%        | $\delta_{\text{CH}}$           | 4                  | 5 | 10 | 0  | 18%        | $\delta_{\text{CH}}$           | 1                  | 5 | 10 | 0  |
|                                   | 16%        | $\delta_{\text{CH}}$           | 3                  | 2 | 8  | 0  | 13%        | $\delta_{\text{CH}}$           | 1                  | 2 | 8  | 0  |
|                                   | 11%        | $\delta_{\text{CH}}$           | 5                  | 4 | 9  | 0  | 6%         | $\delta_{\text{CH}}$           | 3                  | 4 | 9  | 0  |
| 1140                              | 51%        | $\nu_{\text{OC}}$              | 1                  | 2 | 0  | 0  | 21%        | $\delta_{\text{CH}}$           | 1                  | 2 | 8  | 0  |
|                                   | 7%         | $\delta_{\text{CC}}$           | 1                  | 2 | 8  | 0  | 6%         | $\delta_{\text{CH}}$           | 3                  | 2 | 8  | 0  |
| 1099                              | 28%        | $\delta_{\text{CH}}$           | 5                  | 4 | 9  | 0  | 19%        | $\delta_{\text{CH}}$           | 1                  | 5 | 10 | 0  |
|                                   | 18%        | $\delta_{\text{CH}}$           | 3                  | 4 | 9  | 0  | 10%        | $\delta_{\text{CH}}$           | 4                  | 5 | 10 | 0  |
|                                   | 7%         | $\nu_{\text{C}=\text{C}}$      | 4                  | 5 | 0  | 0  | 7%         | $\nu_{\text{OC}}$              | 1                  | 5 | 0  | 0  |
| 988                               | 18%        | $\delta_{\text{CH}}$           | 3                  | 4 | 9  | 0  | 14%        | $\delta_{\text{CC}}$           | 3                  | 4 | 5  | 0  |
|                                   | 12%        | $\delta_{\text{CC}}$           | 1                  | 5 | 4  | 0  | 12%        | $\nu_{\text{CC}}$              | 3                  | 4 | 0  | 0  |
|                                   | 9%         | $\nu_{\text{C}=\text{C}}$      | 2                  | 3 | 0  | 0  | 6%         | $\nu_{\text{OC}}$              | 1                  | 5 | 0  | 0  |
| 968                               | 53%        | $\nu_{\text{OC}}$              | 1                  | 5 | 0  | 0  | 10%        | $\nu_{\text{CC}}$              | 3                  | 4 | 1  | 0  |
|                                   | 6%         | $\nu_{\text{OC}}$              | 1                  | 2 | 0  | 0  | 5%         | $\delta_{\text{CH}}$           | 4                  | 5 | 10 | 0  |
|                                   | 5%         | $\delta_{\text{CH}}$           | 3                  | 4 | 9  | 0  |            |                                |                    |   |    |    |
| 755                               | 36%        | $\delta_{\text{OC}}$           | 2                  | 1 | 5  | 0  | 23%        | $\nu_{\text{OC}}$              | 1                  | 5 | 0  | 0  |
|                                   | 12%        | $\delta_{\text{CC}}$           | 1                  | 5 | 4  | 0  | 6%         | $\delta_{\text{CC}}$           | 1                  | 2 | 3  | 0  |
|                                   | 6%         | $\delta_{\text{CH}}$           | 3                  | 2 | 8  | 0  |            |                                |                    |   |    |    |
| 592                               | 59%        | $\delta_{\text{CNH}}$          | 6                  | 7 | 11 | 0  | 14%        | $\delta_{\text{CC}}$           | 4                  | 3 | 6  | 0  |
|                                   | 11%        | $\delta_{\text{CC}}$           | 2                  | 3 | 6  | 0  | 6%         | $\nu_{\text{CC}}$              | 3                  | 4 | 0  | 0  |
| 544                               | 42%        | $\nu_{\text{CC}}$              | 3                  | 6 | 0  | 0  | 11%        | $\delta_{\text{CC}}$           | 2                  | 3 | 4  | 0  |
|                                   | 8%         | $\delta_{\text{CC}}$           | 1                  | 2 | 3  | 0  | 6%         | $\nu_{\text{C}\equiv\text{N}}$ | 6                  | 7 | 8  | 0  |
|                                   | 6%         | $\nu_{\text{C}=\text{C}}$      | 2                  | 3 | 0  | 0  |            |                                |                    |   |    |    |
| 168                               | 47%        | $\delta_{\text{CNH}}$          | 1                  | 2 | 0  | 0  | 25%        | $\delta_{\text{CC}}$           | 2                  | 3 | 6  | 0  |
|                                   | 25%        | $\delta_{\text{CC}}$           | 4                  | 3 | 6  | 0  |            |                                |                    |   |    |    |
| <b>Out-of-plane modes</b>         |            |                                |                    |   |    |    |            |                                |                    |   |    |    |
| 887                               | 33%        | $\gamma_{\text{CCCH}}$         | 6                  | 3 | 2  | 8  | 29%        | $\gamma_{\text{CCCH}}$         | 4                  | 3 | 2  | 8  |
|                                   | 14%        | $\gamma_{\text{COCH}}$         | 5                  | 1 | 2  | 8  | 11%        | $\gamma_{\text{CCCH}}$         | 3                  | 4 | 5  | 10 |
|                                   | 7%         | $\gamma_{\text{HCCH}}$         | 9                  | 4 | 5  | 10 |            |                                |                    |   |    |    |
| 882                               | 36%        | $\gamma_{\text{HCCH}}$         | 9                  | 4 | 5  | 10 | 16%        | $\gamma_{\text{CCCH}}$         | 6                  | 3 | 4  | 9  |
|                                   | 12%        | $\gamma_{\text{OCCH}}$         | 1                  | 5 | 4  | 9  | 10%        | $\gamma_{\text{CCCH}}$         | 2                  | 3 | 4  | 9  |
|                                   | 9%         | $\gamma_{\text{CCCH}}$         | 3                  | 4 | 5  | 10 | 5%         | $\gamma_{\text{COCH}}$         | 2                  | 1 | 5  | 10 |
| 808                               | 20%        | $\gamma_{\text{CCCH}}$         | 3                  | 4 | 5  | 10 | 19%        | $\gamma_{\text{OCCH}}$         | 1                  | 5 | 4  | 9  |
|                                   | 17%        | $\gamma_{\text{CCCH}}$         | 2                  | 3 | 4  | 9  | 15%        | $\gamma_{\text{CCCH}}$         | 6                  | 3 | 4  | 9  |
|                                   | 10%        | $\gamma_{\text{COCH}}$         | 2                  | 1 | 5  | 10 | 8%         | $\gamma_{\text{CCCH}}$         | 6                  | 3 | 2  | 8  |
| 628                               | 35%        | $\gamma_{\text{CNH}}$          | 3                  | 6 | 7  | 11 | 9%         | $\gamma_{\text{CCCC}}$         | 1                  | 2 | 3  | 4  |
|                                   | 8%         | $\gamma_{\text{CCCH}}$         | 6                  | 3 | 4  | 9  | 7%         | $\gamma_{\text{CCCC}}$         | 5                  | 4 | 3  | 6  |
|                                   | 6%         | $\gamma_{\text{CCCC}}$         | 2                  | 3 | 4  | 5  | 5%         | $\gamma_{\text{CCCH}}$         | 4                  | 3 | 2  | 8  |
| 627                               | 91%        | $\gamma_{\text{CNH}}$          | 3                  | 6 | 7  | 11 |            |                                |                    |   |    |    |
| 561                               | 26%        | $\gamma_{\text{COCC}}$         | 2                  | 1 | 5  | 4  | 25%        | $\gamma_{\text{OCCC}}$         | 1                  | 5 | 4  | 3  |
|                                   | 12%        | $\gamma_{\text{CCCC}}$         | 2                  | 3 | 4  | 5  | 7%         | $\gamma_{\text{CCCC}}$         | 5                  | 4 | 3  | 6  |
|                                   | 7%         | $\gamma_{\text{COCC}}$         | 5                  | 1 | 2  | 3  |            |                                |                    |   |    |    |
| 489                               | 21%        | $\gamma_{\text{CCNH}}$         | 3                  | 6 | 7  | 11 | 15%        | $\gamma_{\text{OCCC}}$         | 1                  | 2 | 3  | 6  |
|                                   | 10%        | $\gamma_{\text{COCC}}$         | 5                  | 1 | 2  | 3  | 9%         | $\gamma_{\text{CCN}}$          | 0                  | 3 | 6  | 7  |
|                                   | 8%         | $\gamma_{\text{OCCC}}$         | 1                  | 2 | 3  | 4  | 6%         | $\gamma_{\text{COCH}}$         | 2                  | 1 | 5  | 10 |
| 209                               | 68%        | $\gamma_{\text{CCNH}}$         | 3                  | 6 | 7  | 11 | 10%        | $\gamma_{\text{CCCC}}$         | 5                  | 4 | 3  | 6  |
|                                   | 9%         | $\gamma_{\text{OCCC}}$         | 1                  | 2 | 3  | 6  |            |                                |                    |   |    |    |
| 83                                | 75%        | $\gamma_{\text{CCN}}$          | 0                  | 3 | 6  | 7  | 18%        | $\gamma_{\text{CCNH}}$         | 3                  | 6 | 7  | 11 |

<sup>a</sup>Only contributions greater than 5% were taken into account; <sup>b</sup>See Scheme S1 for atom numbering;<sup>c</sup> $\nu$ : stretching;  $\delta$ : in-plane bending modes;  $\gamma$ : out-of-plane bending modes.

**Table S8** – M06-2X/6-31G(d,p) calculated frequencies ( $\text{cm}^{-1}$ ), infrared intensities ( $\text{km.mol}^{-1}$ ) and Raman activities ( $\text{\AA}^4/\text{amu}$ ) and Raman intensities ( $\times 10^{-24} \text{F}^2.\text{m}^{-1}.\text{kg}^{-1}$ ) for compounds 2 CFH<sup>+</sup> and 3 CFH<sup>+</sup>.

| 2 CFH <sup>+</sup>     |        |         |            |           | 3 CFH <sup>+</sup>     |        |         |            |           |
|------------------------|--------|---------|------------|-----------|------------------------|--------|---------|------------|-----------|
| Non scaled frequencies | Scaled | IR int. | Ram. Activ | Ram. Int. | Non scaled frequencies | Scaled | IR int. | Ram. Activ | Rama. Int |
| 3684                   | 3475   | 1033.74 | 113.26     | 8.01      | 3746                   | 3486   | 1134.57 | 23.84      | 1.67      |
| 3368                   | 3176   | 19.90   | 119.64     | 11.27     | 3318                   | 3147   | 15.69   | 128.17     | 12.42     |
| 3319                   | 3130   | 21.83   | 86.36      | 8.50      | 3291                   | 3120   | 24.18   | 70.30      | 6.99      |
| 3311                   | 3122   | 7.58    | 77.56      | 7.69      | 3291                   | 3120   | 20.80   | 36.99      | 3.68      |
| 2241                   | 2232   | 561.27  | 211.70     | 49.92     | 2355                   | 2218   | 480.58  | 199.51     | 47.69     |
| 1603                   | 1546   | 23.47   | 10.91      | 5.35      | 1585                   | 1591   | 29.48   | 14.08      | 6.56      |
| 1493                   | 1437   | 176.46  | 57.80      | 32.29     | 1540                   | 1531   | 137.49  | 30.70      | 15.34     |
| 1390                   | 1337   | 57.17   | 21.18      | 13.37     | 1372                   | 1368   | 2.30    | 7.93       | 4.82      |
| 1259                   | 1211   | 12.82   | 1.50       | 1.11      | 1344                   | 1287   | 3.52    | 2.89       | 1.94      |
| 1244                   | 1190   | 8.04    | 8.70       | 6.65      | 1268                   | 1222   | 3.67    | 3.41       | 2.49      |
| 1186                   | 1135   | 18.92   | 4.76       | 3.92      | 1228                   | 1140   | 53.21   | 9.86       | 8.06      |
| 1105                   | 1062   | 19.17   | 17.46      | 15.95     | 1135                   | 1099   | 24.88   | 3.03       | 2.63      |
| 1018                   | 975    | 38.12   | 1.04       | 1.08      | 1033                   | 988    | 11.48   | 8.35       | 8.51      |
| 945                    | 918    | 29.65   | 9.10       | 10.36     | 979                    | 968    | 16.86   | 16.13      | 16.95     |
| 925                    | 875    | 0.15    | 0.38       | 0.46      | 887                    | 887    | 40.90   | 0.07       | 0.09      |
| 892                    | 872    | 6.83    | 5.88       | 7.21      | 881                    | 882    | 5.32    | 0.04       | 0.05      |
| 878                    | 839    | 1.05    | 0.08       | 0.10      | 851                    | 808    | 45.84   | 2.03       | 2.79      |
| 786                    | 740    | 51.01   | 0.80       | 1.25      | 770                    | 755    | 17.87   | 1.42       | 2.15      |
| 655                    | 630    | 33.48   | 1.09       | 2.15      | 620                    | 628    | 68.39   | 0.52       | 1.02      |
| 616                    | 590    | 35.25   | 0.87       | 1.88      | 608                    | 627    | 109.67  | 0.27       | 0.53      |
| 596                    | 575    | 12.19   | 0.38       | 0.86      | 593                    | 592    | 0.19    | 1.61       | 3.46      |
| 569                    | 555    | 3.54    | 24.90      | 58.72     | 579                    | 561    | 20.80   | 5.03       | 11.68     |
| 561                    | 542    | 64.50   | 0.78       | 1.89      | 569                    | 544    | 17.59   | 11.35      | 27.57     |
| 518                    | 505    | 2.84    | 1.41       | 3.82      | 521                    | 489    | 14.57   | 0.48       | 1.38      |
| 294                    | 279    | 483.37  | 48.59      | 324.98    | 192                    | 209    | 91.94   | 0.15       | 1.56      |
| 192                    | 185    | 6.11    | 3.99       | 52.66     | 166                    | 168    | 1.96    | 4.58       | 71.21     |
| 186                    | 179    | 25.45   | 0.81       | 11.21     | 149                    | 83     | 5.48    | 0.66       | 36.22     |



**Table S9** –  $2\text{CNFH}^+$  selected strongest line transitions and the corresponding hyperfine splitting components for  $T = 10\text{ K}$ .

| $J_{K_{-1}K_{+1}} \leftarrow J_{K_{-1}K_{+1}}$ | $F' \leftarrow F''$ | $\nu_{\text{cal}}$ | Est.Err <sup>1</sup> | Int. <sup>2</sup> | Transition                                       | $\nu_{\text{cal}}$ | Est.Err <sup>1</sup> | Int. <sup>2</sup> |
|------------------------------------------------|---------------------|--------------------|----------------------|-------------------|--------------------------------------------------|--------------------|----------------------|-------------------|
| $14_{014} \leftarrow 13_{013}$                 | 14 $\leftarrow$ 14  | 46200.9476         | 0.0000               | 0.0301            | 13 $\leftarrow$ 13                               | 49774.2835         | 0.0000               | 0.0300            |
|                                                | 12 $\leftarrow$ 12  | 46479.1077         | 0.0000               | 0.0354            | 13 $\leftarrow$ 14                               | 49774.4687         | 0.0000               | 0.0000            |
|                                                | 12 $\leftarrow$ 13  | 46479.2314         | 0.0000               | 0.0001            | 13 $\leftarrow$ 12                               | 49774.4829         | 0.0001               | 5.4319            |
| $14_{014} \leftarrow 13_{013}$                 | 12 $\leftarrow$ 11  | 46479.2418         | 0.0001               | 5.5056            | 14 <sub>113</sub> $\leftarrow$ 13 <sub>112</sub> | 49774.4865         | 0.0001               | 6.2711            |
|                                                | 14 $\leftarrow$ 13  | 46479.2457         | 0.0001               | 6.4277            | 14 $\leftarrow$ 13                               | 49774.5525         | 0.0001               | 5.8367            |
|                                                | 13 $\leftarrow$ 12  | 46479.3072         | 0.0001               | 5.9490            | 14 $\leftarrow$ 14                               | 49774.7377         | 0.0000               | 0.0299            |
| $12_{111} \leftarrow 11_{110}$                 | 13 $\leftarrow$ 13  | 46479.4309         | 0.0000               | 0.0354            | 14 $\leftarrow$ 14                               | 49774.7377         | 0.0000               | 0.0299            |
|                                                | 11 $\leftarrow$ 11  | 43124.9010         | 0.0000               | 0.0409            | 13 $\leftarrow$ 13                               | 45981.5151         | 0.0000               | 0.0297            |
|                                                | 11 $\leftarrow$ 12  | 43124.9687         | 0.0000               | 0.0001            | 13 $\leftarrow$ 14                               | 45982.5892         | 0.0000               | 0.0000            |
| $12_{111} \leftarrow 11_{110}$                 | 11 $\leftarrow$ 10  | 43124.9749         | 0.0001               | 5.3817            | 15 $\leftarrow$ 14                               | 45982.6676         | 0.0002               | 6.2278            |
|                                                | 13 $\leftarrow$ 12  | 43124.9791         | 0.0001               | 6.3658            | 13 $\leftarrow$ 12                               | 45982.6721         | 0.0002               | 5.3944            |
|                                                | 12 $\leftarrow$ 11  | 43125.0350         | 0.0001               | 5.8534            | 14 $\leftarrow$ 13                               | 45982.6887         | 0.0002               | 5.7963            |
| $13_{013} \leftarrow 12_{012}$                 | 12 $\leftarrow$ 12  | 43125.1028         | 0.0000               | 0.0409            | 14 $\leftarrow$ 14                               | 45983.7628         | 0.0000               | 0.0297            |
|                                                | 12 $\leftarrow$ 12  | 43053.1158         | 0.0000               | 0.0349            | 12 $\leftarrow$ 12                               | 42771.2954         | 0.0000               | 0.0342            |
|                                                | 12 $\leftarrow$ 13  | 43054.0900         | 0.0000               | 0.0001            | 12 $\leftarrow$ 13                               | 42772.3472         | 0.0000               | 0.0001            |
| $13_{013} \leftarrow 12_{012}$                 | 14 $\leftarrow$ 13  | 43054.1685         | 0.0002               | 6.3332            | 14 $\leftarrow$ 13                               | 42772.4301         | 0.0002               | 6.2150            |
|                                                | 12 $\leftarrow$ 11  | 43054.1714         | 0.0002               | 5.4248            | 12 $\leftarrow$ 11                               | 42772.4352         | 0.0002               | 5.3234            |
|                                                | 13 $\leftarrow$ 12  | 43054.2122         | 0.0002               | 5.8616            | 13 $\leftarrow$ 12                               | 42772.4524         | 0.0002               | 5.7521            |
| $14_{014} \leftarrow 13_{013}$                 | 13 $\leftarrow$ 13  | 43055.1863         | 0.0000               | 0.0349            | 13 $\leftarrow$ 13                               | 42773.5042         | 0.0000               | 0.0342            |
|                                                | 13 $\leftarrow$ 13  | 46198.7991         | 0.0000               | 0.0301            | 11 $\leftarrow$ 11                               | 39909.9233         | 0.0000               | 0.0396            |
|                                                | 13 $\leftarrow$ 14  | 46199.8170         | 0.0000               | 0.0000            | 11 $\leftarrow$ 12                               | 39910.8463         | 0.0000               | 0.0001            |
| $14_{014} \leftarrow 13_{013}$                 | 15 $\leftarrow$ 14  | 46199.8925         | 0.0002               | 6.3131            | 13 $\leftarrow$ 12                               | 39910.9278         | 0.0001               | 6.1607            |
|                                                | 13 $\leftarrow$ 12  | 46199.8955         | 0.0002               | 5.4683            | 11 $\leftarrow$ 10                               | 39910.9305         | 0.0001               | 5.2083            |
|                                                | 14 $\leftarrow$ 13  | 46199.9297         | 0.0002               | 5.8756            | 12 $\leftarrow$ 11                               | 39910.9789         | 0.0001               | 5.6647            |
| $14_{014} \leftarrow 13_{013}$                 | 14 $\leftarrow$ 14  | 46200.9476         | 0.0000               | 0.0301            | 12 $\leftarrow$ 12                               | 39911.9019         | 0.0000               | 0.0396            |
|                                                | 13 $\leftarrow$ 13  | 49774.2835         | 0.0000               | 0.0300            | 14 $\leftarrow$ 14                               | 49348.9706         | 0.0000               | 0.0255            |
|                                                | 13 $\leftarrow$ 14  | 49774.4687         | 0.0000               | 0.0000            | 14 $\leftarrow$ 15                               | 49350.0256         | 0.0000               | 0.0000            |
| $14_{113} \leftarrow 13_{112}$                 | 13 $\leftarrow$ 12  | 49774.4829         | 0.0001               | 5.4319            | 16 $\leftarrow$ 15                               | 49350.0982         | 0.0002               | 6.1149            |
|                                                | 15 $\leftarrow$ 14  | 49774.4865         | 0.0001               | 6.2711            | 14 $\leftarrow$ 13                               | 49350.1012         | 0.0002               | 5.3481            |
|                                                | 14 $\leftarrow$ 13  | 49774.5525         | 0.0001               | 5.8367            | 15 $\leftarrow$ 14                               | 49350.1298         | 0.0002               | 5.7188            |
| $14_{113} \leftarrow 13_{112}$                 | 14 $\leftarrow$ 14  | 49774.7377         | 0.0000               | 0.0299            | 15 $\leftarrow$ 15                               | 49351.1848         | 0.0000               | 0.0255            |

Est.Err<sup>1</sup>: Estimated error (in MHz) for calculated frequency from observed one; Int.<sup>2</sup>: intensity of the line (in  $\times 10^{-3} \text{ nm}^2 \text{ MHz}$ ).

**Table S10** – 3 CNFH<sup>+</sup> selected strongest line transitions and the corresponding hyperfine splitting components for T = 10 K.

| $J_{K_{-1}K_{+1}} \leftarrow J_{K_{-1}K_{+1}}$ | $F' \leftarrow F''$ | $\nu_{\text{cat}}$ | Est.Err <sup>1</sup> | Int. <sup>2</sup> | Transition                            | $\nu_{\text{cat}}$ | Est.Err <sup>1</sup> | Int. <sup>2</sup> |
|------------------------------------------------|---------------------|--------------------|----------------------|-------------------|---------------------------------------|--------------------|----------------------|-------------------|
| 13 <sub>112</sub> ← 12 <sub>111</sub>          | 12 ← 12             | 45437.7268         | 0.0001               | 0.2606            | 13 ← 13                               | 48678.7108         | 0.0001               | 0.2216            |
|                                                | 12 ← 13             | 45437.9860         | 0.0000               | 0.0004            | 13 ← 14                               | 48679.0118         | 0.0000               | 0.0003            |
|                                                | 12 ← 11             | 45438.0077         | 0.0001               | 40.5230           | 13 ← 12                               | 48679.0350         | 0.0001               | 40.2290           |
|                                                | 14 ← 13             | 45438.0092         | 0.0001               | 47.3090           | 14 <sub>113</sub> ← 13 <sub>112</sub> | 48679.0365         | 0.0001               | 46.4430           |
|                                                | 13 ← 12             | 45438.0510         | 0.0001               | 43.7860           | 14 ← 13                               | 48679.0813         | 0.0001               | 43.2250           |
|                                                | 13 ← 13             | 45438.3102         | 0.0001               | 0.2606            | 14 ← 14                               | 48679.3823         | 0.0001               | 0.2217            |
| 12 <sub>111</sub> ← 11 <sub>110</sub>          | 11 ← 11             | 42141.7955         | 0.0001               | 0.2996            | 13 ← 13                               | 44979.7173         | 0.0002               | 0.2189            |
|                                                | 11 ← 12             | 42142.0166         | 0.0000               | 0.0005            | 13 ← 14                               | 44980.6577         | 0.0000               | 0.0003            |
|                                                | 11 ← 10             | 42142.0368         | 0.0001               | 39.3890           | 15 ← 14                               | 44980.7261         | 0.0002               | 45.8610           |
|                                                | 13 ← 12             | 42142.0383         | 0.0001               | 46.5910           | 14 <sub>114</sub> ← 13 <sub>113</sub> | 44980.7302         | 0.0002               | 39.7240           |
|                                                | 12 ← 11             | 42142.0764         | 0.0001               | 42.8400           | 14 ← 13                               | 44980.7416         | 0.0002               | 42.6830           |
|                                                | 12 ← 12             | 42142.2975         | 0.0001               | 0.2996            | 14 ← 14                               | 44981.6820         | 0.0002               | 0.2189            |
| 14 <sub>014</sub> ← 13 <sub>013</sub>          | 13 ← 13             | 45215.0458         | 0.0002               | 0.2222            | 12 ← 12                               | 41836.9572         | 0.0002               | 0.2509            |
|                                                | 13 ← 14             | 45215.9426         | 0.0000               | 0.0003            | 12 ← 13                               | 41837.8811         | 0.0000               | 0.0004            |
|                                                | 15 ← 14             | 45216.0088         | 0.0002               | 46.5580           | 14 ← 13                               | 41837.9536         | 0.0002               | 45.5510           |
|                                                | 13 ← 12             | 45216.0118         | 0.0002               | 40.3280           | 13 <sub>113</sub> ← 12 <sub>112</sub> | 41837.9583         | 0.0002               | 39.0160           |
|                                                | 14 ← 13             | 45216.0363         | 0.0002               | 43.3320           | 13 ← 12                               | 41837.9701         | 0.0002               | 42.1580           |
|                                                | 14 ← 14             | 45216.9331         | 0.0002               | 0.2222            | 13 ← 13                               | 41838.8940         | 0.0002               | 0.2509            |
| 13 <sub>013</sub> ← 12 <sub>012</sub>          | 12 ← 12             | 42137.9563         | 0.0002               | 0.2562            | 14 ← 14                               | 48295.8382         | 0.0002               | 0.1892            |
|                                                | 12 ← 13             | 42138.8210         | 0.0000               | 0.0004            | 14 ← 15                               | 48296.7626         | 0.0000               | 0.0002            |
|                                                | 14 ← 13             | 42138.8901         | 0.0002               | 46.5040           | 16 ← 15                               | 48296.8259         | 0.0002               | 45.3120           |
|                                                | 12 ← 11             | 42138.8933         | 0.0002               | 39.8330           | 14 ← 13                               | 48296.8287         | 0.0002               | 39.6310           |
|                                                | 13 ← 12             | 42138.9223         | 0.0002               | 43.0400           | 15 ← 14                               | 48296.8494         | 0.0002               | 42.3770           |
|                                                | 13 ← 13             | 42139.7869         | 0.0002               | 0.2562            | 15 ← 15                               | 48297.7737         | 0.0002               | 0.1892            |
| 14 <sub>113</sub> ← 13 <sub>112</sub>          | 13 ← 13             | 48678.7108         | 0.0001               | 0.2216            | 11 ← 11                               | 39062.1142         | 0.0001               | 0.2897            |
|                                                | 13 ← 14             | 48679.0118         | 0.0000               | 0.0003            | 11 ← 12                               | 39062.9416         | 0.0000               | 0.0005            |
|                                                | 13 ← 12             | 48679.0350         | 0.0001               | 40.2290           | 13 ← 12                               | 39063.0139         | 0.0001               | 45.0510           |
|                                                | 15 ← 14             | 48679.0365         | 0.0001               | 46.4430           | 12 <sub>012</sub> ← 11 <sub>011</sub> | 39063.0171         | 0.0001               | 38.0870           |
|                                                | 14 ← 13             | 48679.0813         | 0.0001               | 43.2250           | 12 ← 11                               | 39063.0511         | 0.0001               | 41.4250           |
|                                                | 14 ← 14             | 48679.3823         | 0.0001               | 0.2217            | 12 ← 12                               | 39063.8785         | 0.0001               | 0.2897            |

Est.Err<sup>1</sup>: Estimated error (in MHz) for calculated frequency from observed one; Int.<sup>2</sup>: intensity of the line (in  $\times 10^{-3} \text{ nm}^2 \text{ MHz}$ ).
